# Supplementary material for: Chiral tertiary 2-furyl alcohols: diversified key intermediates to bioactive compounds. Their enantioselective synthesis via (2-furyl)aluminium addition to ketones catalyzed by a titanium catalyst of (S)-BINOL
Source: Royal Society of Chemistry journal article supplement (doi:10.1039/b802441c), 2008-01-01

**Chiral Tertiary 2-Furyl Alcohols: Diversified Key Intermediates  
to Bioactive Compounds. Their Enantioselective Synthesis via  
(2-Furyl)aluminum Additions to Ketones Catalyzed by a  
Titanium Catalyst of (*S*)-BINOL**

*Supplementary Information*

*Kuo-Hui Wu, Da-Wei Chuang, Chien-An Chen and Han-Mou Gau\**

Department of Chemistry, National Chung Hsing University, Taichung, Taiwan 402,

Republic of China

\*Correspondent Author, e-mail: [hmgau@dragon.nchu.edu.tw](mailto:hmgau@dragon.nchu.edu.tw); phone: +886-4-22878615; fax:

+886-4-22862547

## Table of Contents

|                                                           |  |                                                       |
|-----------------------------------------------------------|--|-------------------------------------------------------|
| <b>I. Experimental Section</b>                            |  | S4                                                    |
| 1. Reagent and General Techniques                         |  | S4                                                    |
| 2. Synthesis of (2-Furyl)AlEt <sub>2</sub> (THF) (7)      |  | S4                                                    |
| <b>II. Characterizations of Tertiary 2-Furyl Alcohols</b> |  | S5                                                    |
| 1.                                                        |  | 1-Furan-2-yl-1-phenyl-ethanol S5                      |
| 2.                                                        |  | 1-Furan-2-yl-1-m-tolyl-ethanol S6                     |
| 3.                                                        |  | 1-Furan-2-yl-1-p-tolyl-ethanol S7                     |
| 4.                                                        |  | 1-Furan-2-yl-1-(4-methoxy-phenyl)-ethanol S8          |
| 5.                                                        |  | 1-(2-Chloro-phenyl)-1-furan-2-yl-ethanol S9           |
| 6.                                                        |  | 1-(4-Chloro-phenyl)-1-furan-2-yl-ethanol S10          |
| 7.                                                        |  | 1-(2-Bromo-phenyl)-1-furan-2-yl-ethanol S11           |
| 8.                                                        |  | 1-(4-Bromo-phenyl)-1-furan-2-yl-ethanol S12           |
| 9.                                                        |  | 1-Furan-2-yl-1-(4-trifluoromethyl-phenyl)-ethanol S13 |

10. 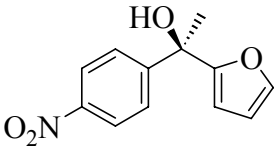 1-Furan-2-yl-1-(4-nitro-phenyl)-ethanol S14
11.  1-Furan-2-yl-1-naphthalen-1-yl-ethanol S15
12.  1-Furan-2-yl-1-naphthalen-2-yl-ethanol S16
13.  3-Bromo-2-furan-2-yl-4-phenyl-but-3-en-2-ol S17

III.  $^1\text{H}$  NMR of (2-Furyl)AlEt<sub>2</sub>(THF) S18

## I. Experimental Section

### 1. Reagent and General Techniques

Ti(O-*i*-Pr)<sub>4</sub> was freshly distilled prior to use. Ketones were used directly. Solvents were dried by refluxing for at least 24 h over sodium/benzophenone (THF or Hexane) and were freshly distilled prior to use. All syntheses and manipulations were carried out under a dry nitrogen atmosphere.

### 2. Synthesis of (2-Furyl)AlEt<sub>2</sub>(THF) (7)

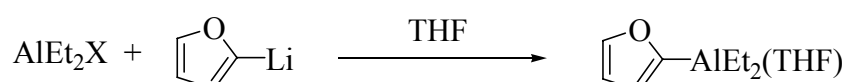

*n*-Butyl lithium (100 mmol) was added slowly to a solution of furan (36.4 mL, 500 mmol) in dry THF (100 mL) at -78 °C. The mixture was stirred for 1 h at -78 °C and then 30 min at 0 °C. The resulting solution was cooled to -78 °C and then a solution of AlEt<sub>2</sub>X (100 mmol, X = Cl or Br) in THF (100 mL) was added. After stirring for 1 h at -78 °C, the mixture was warmed up to room temperature and stirred for 12 h. The solvent was removed under reduced pressures to give an orange oil containing white suspension. The oily material was extracted with dry hexane (3 × 100 mL), and the combined extract was concentrated to furnish an orange oil of **7** which is a mixture of three major species along with trace amounts of unidentified impurities. The reagent **7** is designated as (2-furyl)AlEt<sub>2</sub>(THF) for simplification and used directly for the catalytic reactions. <sup>1</sup>H NMR (CDCl<sub>3</sub>, 400 MHz): AlEt<sub>3</sub>(THF) (25%), δ 0.99 (t, *J* = 8.0 Hz, 9H, CH<sub>3</sub>), -0.23 (q, *J* = 8.0 Hz, 6H, CH<sub>2</sub>); (2-furyl)AlEt<sub>2</sub>(THF) (60%), 7.68 (d, *J* = 1.2 Hz, 1H, CH), 6.61 (d, *J* = 3.2 Hz, 1H, CH), 6.34 (m, 1H, CH), 1.08 (t, *J* = 8.0 Hz, 6H, CH<sub>3</sub>), -0.01 (q, *J* = 8.0 Hz, 4H, CH<sub>2</sub>); (2-furyl)<sub>2</sub>AlEt(THF) (15%), 7.73 (d, *J* = 1.2 Hz, 2H, CH), 6.75 (d, *J* = 2.8 Hz, 2H, CH), 6.37 (m, 2H, CH), 1.16 (t, *J* = 8.0 Hz, 3H, CH<sub>3</sub>), 0.19 (t, *J* = 8.0 Hz, 2H, CH<sub>2</sub>); 2.04 (m, THF), 4.09 (m, THF) ppm.

## II. Characterizations of Tertiary 2-Furyl Alcohols

### 1-Furan-2-yl-1-phenyl-ethanol (Table 2, entry 1; 93% ee):

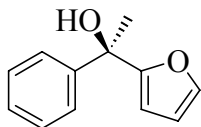

Column: Chiralcel OD  
Eluent: Hexane/IPA = 99/1  
Flow rate: 1 mL/min  
Detector: UV, 254 nm  
Retention time: 17.736 min, 19.376 min

| Racemic standard |         |         | Catalytic Reaction Product |        |         |
|------------------|---------|---------|----------------------------|--------|---------|
|                  |         |         |                            |        |         |
| Peak No.         | 1       | 2       | Peak No.                   | 1      | 2       |
| Time             | 17.736  | 19.376  | Time                       | 16.972 | 18.845  |
| Height (mAU)     | 19.686  | 17.815  | Height (mAU)               | 0.834  | 15.575  |
| Area (mAU-s)     | 627.473 | 626.455 | Area (mAU-s)               | 18.466 | 480.948 |
| Area (%)         | 50.041  | 49.959  | Area (%)                   | 3.697  | 96.303  |

#### Catalytic Reaction Conditions:

acetophenone: 0.50 mmol, (*S*)-BINOL: 10 mol%, AlEt<sub>2</sub>(2-furyl)(THF): 1.1 mmol,  
Ti(O-*i*-Pr)<sub>4</sub>: 1.15 mmol, 0 °C, THF: 6 mL, 12 h, Procedure B.

#### Spectrum Data:

<sup>1</sup>H NMR (400 MHz, CDCl<sub>3</sub>): δ 7.40-7.26 (m, 6H, *Ph* & OCH=C), 6.33 (dd, *J* = 3.2, 1.6 Hz, 1H, OCH=CH), 6.24 (dd, *J* = 3.2, 0.8 Hz, 1H, CHCH=C), 2.60 (br, 1H, OH), 1.87 (s, 3H, CH<sub>3</sub>) ppm.

<sup>13</sup>C{<sup>1</sup>H} NMR (100 MHz, CDCl<sub>3</sub>): δ 158.94, 145.80, 142.10, 128.13, 127.27, 125.20, 110.03, 106.20, 72.95, 29.20 ppm.

**1-Furan-2-yl-1-*m*-tolyl-ethanol (Table 2, entry 2; 90% ee):**

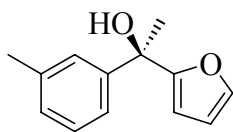

Column: Chiralcel OD  
Eluent: Hexane/IPA = 99/1  
Flow rate: 1 mL/min  
Detector: UV, 254 nm  
Retention time: 15.375 min, 18.716 min

| Racemic standard |         |         | Catalytic Reaction Product |        |         |
|------------------|---------|---------|----------------------------|--------|---------|
|                  |         |         |                            |        |         |
| Peak No.         | 1       | 2       | Peak No.                   | 1      | 2       |
| Time             | 15.375  | 18.716  | Time                       | 15.431 | 18.658  |
| Height (mAU)     | 24.429  | 20.061  | Height (mAU)               | 1.330  | 20.508  |
| Area (mAU-s)     | 615.271 | 627.315 | Area (mAU-s)               | 32.835 | 636.641 |
| Area (%)         | 49.515  | 50.485  | Area (%)                   | 4.905  | 95.095  |

**Catalytic Reaction Conditions:**

3<sup>3</sup>-methylacetophenone: 0.50 mmol, (*S*)-BINOL: 20 mol%, AlEt<sub>2</sub>(2-furyl)(THF): 1.0 mmol, Ti(O-*i*-Pr)<sub>4</sub>: 1.20 mmol, 0 °C, THF: 6 mL, 12 h. Procedure A.

**Spectrum Data:**

<sup>1</sup>H NMR (400 MHz, CDCl<sub>3</sub>): δ 7.37-7.08 (m, 5H, *Ar* & OCH=C), 6.33 (dd, *J* = 3.2, 1.6 Hz, 1H, OCH=CH), 6.25 (dd, *J* = 3.6, 1.2 Hz, 1H, CHCH=C), 2.35 (s, 3H, ArCH<sub>3</sub>), 1.87 (s, 3H, OCCH<sub>3</sub>) ppm.

<sup>13</sup>C {<sup>1</sup>H} NMR (100 MHz, CDCl<sub>3</sub>): δ 158.98, 145.70, 142.00, 137.66, 127.98, 127.96, 125.78, 122.26, 109.93, 106.05, 72.80, 29.14, 21.50 ppm.

### 1-Furan-2-yl-1-*p*-tolyl-ethanol (Table 2, entry 3; 93% ee):

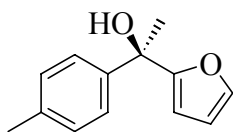

Column: Chiralcel OD  
Eluent: Hexane/IPA = 99.5/0.5  
Flow rate: 1 mL/min  
Detector: UV, 254 nm  
Retention time: 25.305 min, 27.863 min

| Racemic standard |         |         | Catalytic Reaction Product |        |         |
|------------------|---------|---------|----------------------------|--------|---------|
|                  |         |         |                            |        |         |
| Peak No.         | 1       | 2       | Peak No.                   | 1      | 2       |
| Time             | 25.305  | 27.863  | Time                       | 25.597 | 27.857  |
| Height (mAU)     | 14.906  | 13.324  | Height (mAU)               | 0.719  | 14.528  |
| Area (mAU-s)     | 643.474 | 636.980 | Area (mAU-s)               | 27.246 | 710.070 |
| Area (%)         | 50.254  | 49.746  | Area (%)                   | 3.695  | 96.305  |

#### Catalytic Reaction Conditions:

4'-methylacetophenone: 0.50 mmol, (*S*)-BINOL: 20 mol%, AlEt<sub>2</sub>(2-furyl)(THF): 1.0 mmol, Ti(O-*i*-Pr)<sub>4</sub>: 1.20 mmol, 0 °C, THF: 6 mL, 12 h. Procedure A.

#### Spectrum Data:

<sup>1</sup>H NMR (400 MHz, CDCl<sub>3</sub>): δ 7.37-7.03 (m, 5H, *Ar* & OCH=C), 6.34-6.32 (m, 1H, OCH=CH), 6.24-6.23 (m, 1H, CHCH=C), 2.34 (s, 3H, ArCH<sub>3</sub>), 1.86 (s, 3H, OCCH<sub>3</sub>) ppm.

<sup>13</sup>C {<sup>1</sup>H} NMR (100 MHz, CDCl<sub>3</sub>): δ 141.78, 136.59, 131.05, 130.62, 128.62, 125.04, 109.82, 105.88, 72.63, 28.97, 20.80 ppm.

### 1-Furan-2-yl-1-(4-methoxy-phenyl)-ethanol (Table 2, entry 4; 92% ee):

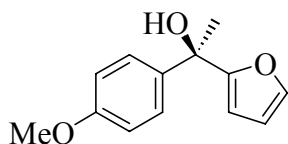

Column: Chiralcel OD  
Eluent: Hexane/IPA = 98/2  
Flow rate: 1 mL/min  
Detector: UV, 254 nm  
Retention time: 17.697 min, 20.296 min

| Racemic standard |          |          | Catalytic Reaction Product |        |         |
|------------------|----------|----------|----------------------------|--------|---------|
|                  |          |          |                            |        |         |
| Peak No.         | 1        | 2        | Peak No.                   | 1      | 2       |
| Time             | 17.697   | 20.296   | Time                       | 17.789 | 20.267  |
| Height (mAU)     | 45.743   | 42.534   | Height (mAU)               | 0.898  | 17.815  |
| Area (mAU-s)     | 1544.200 | 1572.293 | Area (mAU-s)               | 26.904 | 625.325 |
| Area (%)         | 49.549   | 50.451   | Area (%)                   | 4.125  | 95.875  |

#### Catalytic Reaction Conditions:

4'-methoxyacetophenone: 0.50 mmol, (*S*)-BINOL: 10 mol%, AlEt<sub>2</sub>(2-furyl)(THF): 1.1 mmol, Ti(*O-i-Pr*)<sub>4</sub>: 1.15 mmol, 0 °C, THF: 6 mL, 12 h. Procedure B.

#### Spectrum Data:

<sup>1</sup>H NMR (400 MHz, CDCl<sub>3</sub>): δ 7.37-7.26 (m, 3H, *Ar* & OCH=C), 6.88-6.86 (m, 2H, *Ar*), 6.34-6.33 (m, 1H, OCH=CH), 6.23-6.22 (m, 1H, CHCH=C), 3.80 (s, 3H, OCH<sub>3</sub>), 2.45 (br, 1H, OH), 1.86 (s, 3H, OCCH<sub>3</sub>) ppm.

<sup>13</sup>C{<sup>1</sup>H} NMR (100 MHz, CDCl<sub>3</sub>): δ 158.81, 142.07, 138.06, 126.51, 114.77, 113.49, 110.03, 106.05, 72.71, 55.26, 29.26 ppm.



**1-(2-Chloro-phenyl)-1-furan-2-yl-ethanol (Table 2, entry 5; 92% ee):**

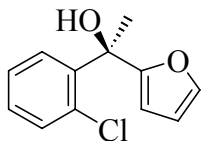

Column: Chiralcel OD  
Eluent: Hexane/IPA = 99/1  
Flow rate: 1 mL/min  
Detector: UV, 254 nm  
Retention time: 15.147 min, 18.421 min

| Racemic standard |         |         | Catalytic Reaction Product |        |         |
|------------------|---------|---------|----------------------------|--------|---------|
|                  |         |         |                            |        |         |
| Peak No.         | 1       | 2       | Peak No.                   | 1      | 2       |
| Time             | 15.147  | 18.421  | Time                       | 15.411 | 18.873  |
| Height (mAU)     | 26.869  | 22.465  | Height (mAU)               | 0.941  | 16.331  |
| Area (mAU-s)     | 706.315 | 709.475 | Area (mAU-s)               | 23.003 | 518.525 |
| Area (%)         | 49.888  | 50.112  | Area (%)                   | 4.248  | 95.752  |

**Catalytic Reaction Conditions:**

2'-chloroacetophenone: 0.50 mmol, (*S*)-BINOL: 10 mol%, AlEt<sub>2</sub>(2-furyl)(THF): 1.1 mmol, Ti(O-*i*-Pr)<sub>4</sub>: 1.15 mmol, 0 °C, THF: 6 mL, 24 h. Procedure B.

**Spectrum Data:**

<sup>1</sup>H NMR (400 MHz, CDCl<sub>3</sub>): δ 7.79-7.22 (m, 5H, *Ar* & OCH=C), 6.36-6.35 (dd, *J* = 4.8, 1.6 Hz, 1H, OCH=CH), 6.27-6.25 (dd, *J* = 3.6, 0.8 Hz, 1H, CHCH=C) 2.17 (br, 1H, OH) 2.01 (s, 3H, CH<sub>3</sub>) ppm.

<sup>13</sup>C {<sup>1</sup>H} NMR (100 MHz, CDCl<sub>3</sub>): δ 147.37, 146.50, 132.64, 128.23, 128.15, 127.28, 127.14, 125.72, 75.80, 30.68 ppm.

**1-(4-Chloro-phenyl)-1-furan-2-yl-ethanol (Table 2, entry 6; 91% ee):**

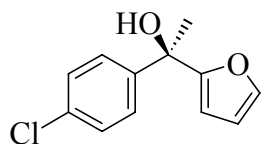

Column: Chiralcel OD  
Eluent: Hexane/IPA = 99/1  
Flow rate: 1 mL/min  
Detector: UV, 254 nm  
Retention time: 16.809 min, 20.932 min

| Racemic standard |         |         | Catalytic Reaction Product |         |          |
|------------------|---------|---------|----------------------------|---------|----------|
|                  |         |         |                            |         |          |
| Peak No.         | 1       | 2       | Peak No.                   | 1       | 2        |
| Time             | 16.809  | 20.932  | Time                       | 16.544  | 20.388   |
| Height (mAU)     | 11.623  | 9.244   | Height (mAU)               | 7.534   | 130.962  |
| Area (mAU-s)     | 319.714 | 314.718 | Area (mAU-s)               | 425.605 | 8755.197 |
| Area (%)         | 50.394  | 49.606  | Area (%)                   | 4.636   | 95.364   |

**Catalytic Reaction Conditions:**

4'-chloroacetophenone: 0.50 mmol, (*S*)-BINOL: 10 mol%, AlEt<sub>2</sub>(2-furyl)(THF): 1.1 mmol, Ti(O-*i*-Pr)<sub>4</sub>: 1.15 mmol, 0 °C, THF: 6 mL, 12 h. Procedure B.

**Spectrum Data:**

<sup>1</sup>H NMR (400 MHz, CDCl<sub>3</sub>): δ 7.39-7.28 (m, 5H, *Ar* & OCH=C), 6.35-6.33 (dd, J = 3.6, 2.0 Hz, 1H, OCH=CH), 6.25-6.24 (dd, J = 3.6, 1.2 Hz, 1H, CHCH=C), 2.52 (br, 1H, OH), 1.85 (s, 3H, CH<sub>3</sub>) ppm.

<sup>13</sup>C{<sup>1</sup>H} NMR (100 MHz, CDCl<sub>3</sub>): δ 158.43, 144.34, 142.31, 133.15, 128.27, 126.79, 110.14, 106.38, 72.62, 29.26 ppm.

### 1-(2-Bromo-phenyl)-1-furan-2-yl-ethanol (Table 2, entry 7; 93% ee):

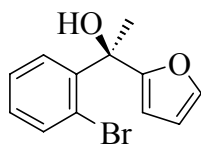

Column: Chiralcel OD  
Eluent: Hexane/IPA = 99/1  
Flow rate: 1 mL/min  
Detector: UV, 254 nm  
Retention time: 15.568 min, 19.159 min

| Racemic standard |        |        | Catalytic Reaction Product |        |         |
|------------------|--------|--------|----------------------------|--------|---------|
|                  |        |        |                            |        |         |
| Peak No.         | 1      | 2      | Peak No.                   | 1      | 2       |
| Time             | 15.568 | 19.159 | Time                       | 15.472 | 18.992  |
| Height (mAU)     | 2.374  | 2.019  | Height (mAU)               | 0.203  | 4.271   |
| Area (mAU-s)     | 69.833 | 66.135 | Area (mAU-s)               | 5.132  | 134.797 |
| Area (%)         | 51.360 | 48.640 | Area (%)                   | 3.667  | 96.333  |

#### Catalytic Reaction Conditions:

2'-bromoacetophenone: 0.50 mmol, (*S*)-BINOL: 20 mol%, AlEt<sub>2</sub>(2-furyl)(THF): 1.15 mmol, Ti(O-*i*-Pr)<sub>4</sub>: 1.2 mmol, 0 °C, THF: 6 mL, 24 h. Procedure A.

#### Spectrum Data:

<sup>1</sup>H NMR (400 MHz, CDCl<sub>3</sub>): δ 7.82-7.14 (m, 5H, *Ar* & OCH=C), 6.37-6.36 (dd, *J* = 3.2, 1.6 Hz, 1H, OCH=CH), 6.26-6.25 (dd, *J* = 3.2, 0.8 Hz, 1H, CHCH=C) 2.02(s, 3H, CH<sub>3</sub>)ppm.

<sup>13</sup>C{<sup>1</sup>H} NMR (100 MHz, CDCl<sub>3</sub>): δ 141.61, 134.67, 129.06, 129.02, 128.21, 127.86, 127.40, 125.29, 110.47, 107.07, 26.56, 21.42 ppm.

**1-(4-Bromo-phenyl)-1-furan-2-yl-ethanol (Table 2, entry 8; 90% ee):**

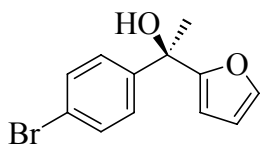

Column: Chiralcel OD  
Eluent: Hexane/IPA = 99/1  
Flow rate: 1 mL/min  
Detector: UV, 254 nm  
Retention time: 16.509 min, 20.951 min

| Racemic standard |          |          | Catalytic Reaction Product |        |         |
|------------------|----------|----------|----------------------------|--------|---------|
|                  |          |          |                            |        |         |
| Peak No.         | 1        | 2        | Peak No.                   | 1      | 2       |
| Time             | 16.509   | 20.951   | Time                       | 16.231 | 20.264  |
| Height (mAU)     | 39.547   | 33.083   | Height (mAU)               | 1.595  | 21.707  |
| Area (mAU-s)     | 1388.805 | 1379.962 | Area (mAU-s)               | 40.175 | 729.544 |
| Area (%)         | 50.159   | 49.841   | Area (%)                   | 5.219  | 94.781  |

**Catalytic Reaction Conditions:**

4'-bromoacetophenone: 0.50 mmol, (*S*)-BINOL: 10 mol%, AlEt<sub>2</sub>(2-furyl)(THF): 1.1 mmol, Ti(O-*i*-Pr)<sub>4</sub>: 1.15 mmol, 0 °C, THF: 6 mL, 12 h. Procedure B.

**Spectrum Data:**

<sup>1</sup>H NMR (400 MHz, CDCl<sub>3</sub>): δ 7.47-7.26 (m, 5H, *Ar* & OCH=C), 6.35-6.26 (m, 1H, OCH=CH), 6.26-6.25 (m, 1H, CHCH=C), 2.47 (br, 1H, OH), 1.85 (s, 3H, CH<sub>3</sub>) ppm.

<sup>13</sup>C{<sup>1</sup>H} NMR (100 MHz, CDCl<sub>3</sub>): δ 144.87, 142.34, 131.25, 127.15, 121.32, 110.15, 106.41, 72.67, 29.23 ppm.

**1-Furan-2-yl-1-(4-trifluoromethyl-phenyl)-ethanol (Table 2, entry 9; 91% ee):**

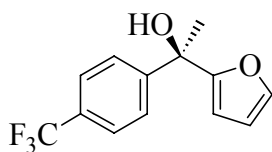

Column: Chiralcel OD  
Eluent: Hexane/IPA = 97/3  
Flow rate: 1 mL/min  
Detector: UV, 254 nm  
Retention time: 8.869 min, 11.177 min

| Racemic standard |          |          | Catalytic Reaction Product |        |          |
|------------------|----------|----------|----------------------------|--------|----------|
|                  |          |          |                            |        |          |
| Peak No.         | 1        | 2        | Peak No.                   | 1      | 2        |
| Time             | 8.869    | 11.177   | Time                       | 8.577  | 10.622   |
| Height (mAU)     | 114.889  | 91.139   | Height (mAU)               | 5.891  | 87.993   |
| Area (mAU-s)     | 1738.978 | 1738.751 | Area (mAU-s)               | 76.590 | 1559.355 |
| Area (%)         | 50.003   | 49.997   | Area (%)                   | 4.682  | 95.318   |

**Catalytic Reaction Conditions:**

4'-trifluoromethylacetophenone: 0.50 mmol, (*S*)-BINOL: 10 mol%, AlEt<sub>2</sub>(2-furyl)(THF): 1.1 mmol, Ti(*O-i*-Pr)<sub>4</sub>: 1.15 mmol, 0 °C, THF: 6 mL, 12 h. Procedure B.

**Spectrum Data:**

<sup>1</sup>H NMR (400 MHz, CDCl<sub>3</sub>): δ 7.61-7.26 (m, 5H, *Ar* & OCH=C), 6.37-6.38 (m, 1H, OCH=CH), 6.36-6.28 (m, 1H, CHCH=C), 2.55 (br, 1H, OH), 1.88 (s, 3H, CH<sub>3</sub>) ppm.

<sup>13</sup>C{<sup>1</sup>H} NMR (100 MHz, CDCl<sub>3</sub>): δ 158.11, 149.71, 142.47, 125.70, 125.18, 125.14, 114.79, 110.22, 106.57, 72.77, 29.28 ppm.

**1-Furan-2-yl-1-(4-nitro-phenyl)-ethanol (Table 2, entry 10; 92% ee):**

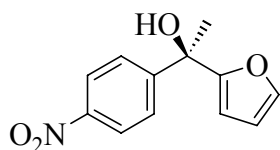

Column: Chiralcel OD  
Eluent: Hexane/IPA = 95/5  
Flow rate: 1 mL/min  
Detector: UV, 254 nm  
Retention time: 14.180 min, 17.799 min

| Racemic standard |          |          | Catalytic Reaction Product |         |         |
|------------------|----------|----------|----------------------------|---------|---------|
|                  |          |          |                            |         |         |
| Peak No.         | 1        | 2        | Peak No.                   | 1       | 2       |
| Time             | 14.180   | 17.799   | Time                       | 13.824  | 17.173  |
| Height (mAU)     | 54.963   | 43.583   | Height (mAU)               | 18.794  | 333.794 |
| Area (mAU-s)     | 1355.074 | 1355.172 | Area (mAU-s)               | 445.455 | 10220.3 |
| Area (%)         | 49.999   | 50.001   | Area (%)                   | 4.176   | 95.824  |

**Catalytic Reaction Conditions:**

4'-nitroacetophenone: 0.50 mmol, (*S*)-BINOL: 20 mol%, AlEt<sub>2</sub>(2-furyl)(THF): 1.0 mmol, Ti(O-*i*-Pr)<sub>4</sub>: 1.2 mmol, 0 °C, THF: 6 mL, 12 h. Procedure A.

**Spectrum Data:**

<sup>1</sup>H NMR (400 MHz, CDCl<sub>3</sub>): δ 8.20-8.18 (dd, *J* = 6.8, 2.0 Hz, 1H, OCH=C), 7.61-7.16 (m, 4H, *Ar*), 6.38-6.37 (m, 1H, OCH=CH), 6.32-6.31 (dd, *J* = 3.2, 0.8 Hz, 1H, CHCH=C), 2.36 (br, 1H, OH), 1.90 (s, 3H, CH<sub>3</sub>) ppm.

<sup>13</sup>C{<sup>1</sup>H} NMR (100 MHz, CDCl<sub>3</sub>): δ 142.64, 128.99, 128.18, 126.31, 125.25, 123.40, 110.28, 106.77, 72.66, 29.20 ppm.

**1-Furan-2-yl-1-naphthalen-1-yl-ethanol (Table 2, entry 11; 87% ee):**

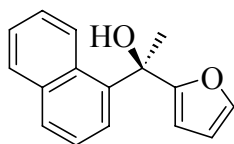

Column: Chiralcel OD  
Eluent: Hexane/IPA = 99/1  
Flow rate: 1 mL/min  
Detector: UV, 254 nm  
Retention time: 21.915 min, 29.874 min

| Racemic standard |          |          | Catalytic Reaction Product |         |          |
|------------------|----------|----------|----------------------------|---------|----------|
|                  |          |          |                            |         |          |
| Peak No.         | 1        | 2        | Peak No.                   | 1       | 2        |
| Time             | 21.915   | 29.874   | Time                       | 22.726  | 30.154   |
| Height (mAU)     | 29.783   | 21.850   | Height (mAU)               | 3.943   | 38.495   |
| Area (mAU-s)     | 1198.058 | 1191.555 | Area (mAU-s)               | 145.197 | 2010.523 |
| Area (%)         | 50.136   | 49.864   | Area (%)                   | 6.735   | 93.265   |

**Catalytic Reaction Conditions:**

1'-acetonaphthone: 0.50 mmol, (*S*)-BINOL: 20 mol%, AlEt<sub>2</sub>(2-furyl)(THF): 1.15 mmol, Ti(O-*i*-Pr)<sub>4</sub>: 1.20 mmol, 0 °C, THF: 6 mL, 24 h. Procedure A.

**Spectrum Data:**

<sup>1</sup>H NMR (400 MHz, CDCl<sub>3</sub>): δ 8.10-7.25 (m, 8H, *Ar* & OCH=C), 6.37-6.36 (m, 1H, OCH=CH), 6.29-6.28 (m, 1H, CHCH=C), 2.63 (br, 1H, OH), 2.12 (s, 3H, CH<sub>3</sub>) ppm.

<sup>13</sup>C{<sup>1</sup>H} NMR (100 MHz, CDCl<sub>3</sub>): δ 159.40, 141.85, 140.63, 134.58, 129.08, 129.00, 128.93, 125.89, 125.46, 125.10, 124.92, 123.74, 110.38, 106.43, 73.43, 28.37 ppm.

### 1-Furan-2-yl-1-naphthalen-2-yl-ethanol (Table 2, entry 12; 90% ee):

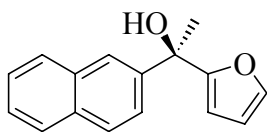

Column: Chiralcel OD  
Eluent: Hexane/IPA = 95/5  
Flow rate: 1 mL/min  
Detector: UV, 254 nm  
Retention time: 10.363 min, 13.683 min

| Racemic standard |          |          | Catalytic Reaction Product |         |         |
|------------------|----------|----------|----------------------------|---------|---------|
|                  |          |          |                            |         |         |
| Peak No.         | 1        | 2        | Peak No.                   | 1       | 2       |
| Time             | 10.363   | 13.683   | Time                       | 9.910   | 12.824  |
| Height (mAU)     | 407.983  | 307.500  | Height (mAU)               | 54.639  | 717.753 |
| Area (mAU-s)     | 7537.483 | 7574.478 | Area (mAU-s)               | 885.479 | 16161.7 |
| Area (%)         | 49.878   | 50.122   | Area (%)                   | 5.194   | 94.806  |

#### Catalytic Reaction Conditions:

2'-acetonaphthone: 0.50 mmol, (*S*)-BINOL: 10 mol%, AlEt<sub>2</sub>(2-furyl)(THF): 1.1 mmol, Ti(O-*i*-Pr)<sub>4</sub>: 1.15 mmol, 0 °C, THF: 6 mL, 12 h. Procedure B.

#### Spectrum Data:

<sup>1</sup>H NMR (400 MHz, CDCl<sub>3</sub>): δ 7.91-7.25 (m, 8H, *Ar* & OCH=C), 6.36-6.35 (m, 1H, OCH=CH), 6.29-6.28 (m, 1H, CHCH=C), 2.63 (br, 1H, OH), 1.96 (s, 3H, CH<sub>3</sub>) ppm.

<sup>13</sup>C{<sup>1</sup>H} NMR (100 MHz, CDCl<sub>3</sub>): δ 158.89, 143.14, 142.23, 133.10, 132.65, 128.28, 127.88, 127.51, 126.11, 125.98, 123.94, 123.62, 110.13, 106.40, 73.11, 29.13 ppm.



**3-Bromo-2-furan-2-yl-4-phenyl-but-3-en-2-ol (Table 2, entry 13; 88% ee):**

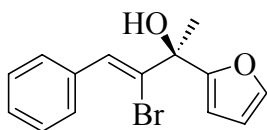

Column: Chiralcel OD  
Eluent: Hexane/IPA = 95/5  
Flow rate: 1 mL/min  
Detector: UV, 254 nm  
Retention time: 9.384 min, 11.564 min

| Racemic standard |         |         | Catalytic Reaction Product |         |          |
|------------------|---------|---------|----------------------------|---------|----------|
|                  |         |         |                            |         |          |
| Peak No.         | 1       | 2       | Peak No.                   | 1       | 2        |
| Time             | 9.384   | 11.564  | Time                       | 9.856   | 12.100   |
| Height (mAU)     | 944.953 | 775.362 | Height (mAU)               | 119.521 | 1481.022 |
| Area (mAU-s)     | 16097.6 | 16454.0 | Area (mAU-s)               | 2025.7  | 31384.7  |
| Area (%)         | 49.453  | 50.547  | Area (%)                   | 6.063   | 93.937   |

**Catalytic Reaction Conditions:**

(*Z*)-3-bromo-4-phenylbut-3-en-2-one 0.50 mmol, (*S*)-BINOL: 20 mol%,  
AlEt<sub>2</sub>(2-furyl)(THF): 1.0 mmol, Ti(O-*i*-Pr)<sub>4</sub>: 1.2 mmol, 0 °C, THF: 6 mL, 12 h. Procedure A.

**Spectrum Data:**

<sup>1</sup>H NMR (400 MHz, CDCl<sub>3</sub>): δ 7.48-7.16 (m, 7H, *Ph* & PhCH & OCH=C), 6.47-6.45 (m, 1H, OCH=CH), 6.36-6.35 (m, 1H, CHCH=C), 2.36 (br, 1H, OH), 1.94 (s, 3H, CH<sub>3</sub>) ppm.

<sup>13</sup>C{<sup>1</sup>H} NMR (100 MHz, CDCl<sub>3</sub>): δ 142.40, 131.71, 128.96, 128.53, 128.21, 128.16, 125.23, 122.22, 110.18, 105.78, 90.23, 83.85, 65.23, 28.62 ppm.

A1Et2Fu(THF)-d2=100  
Pulse Sequence: s2pu1

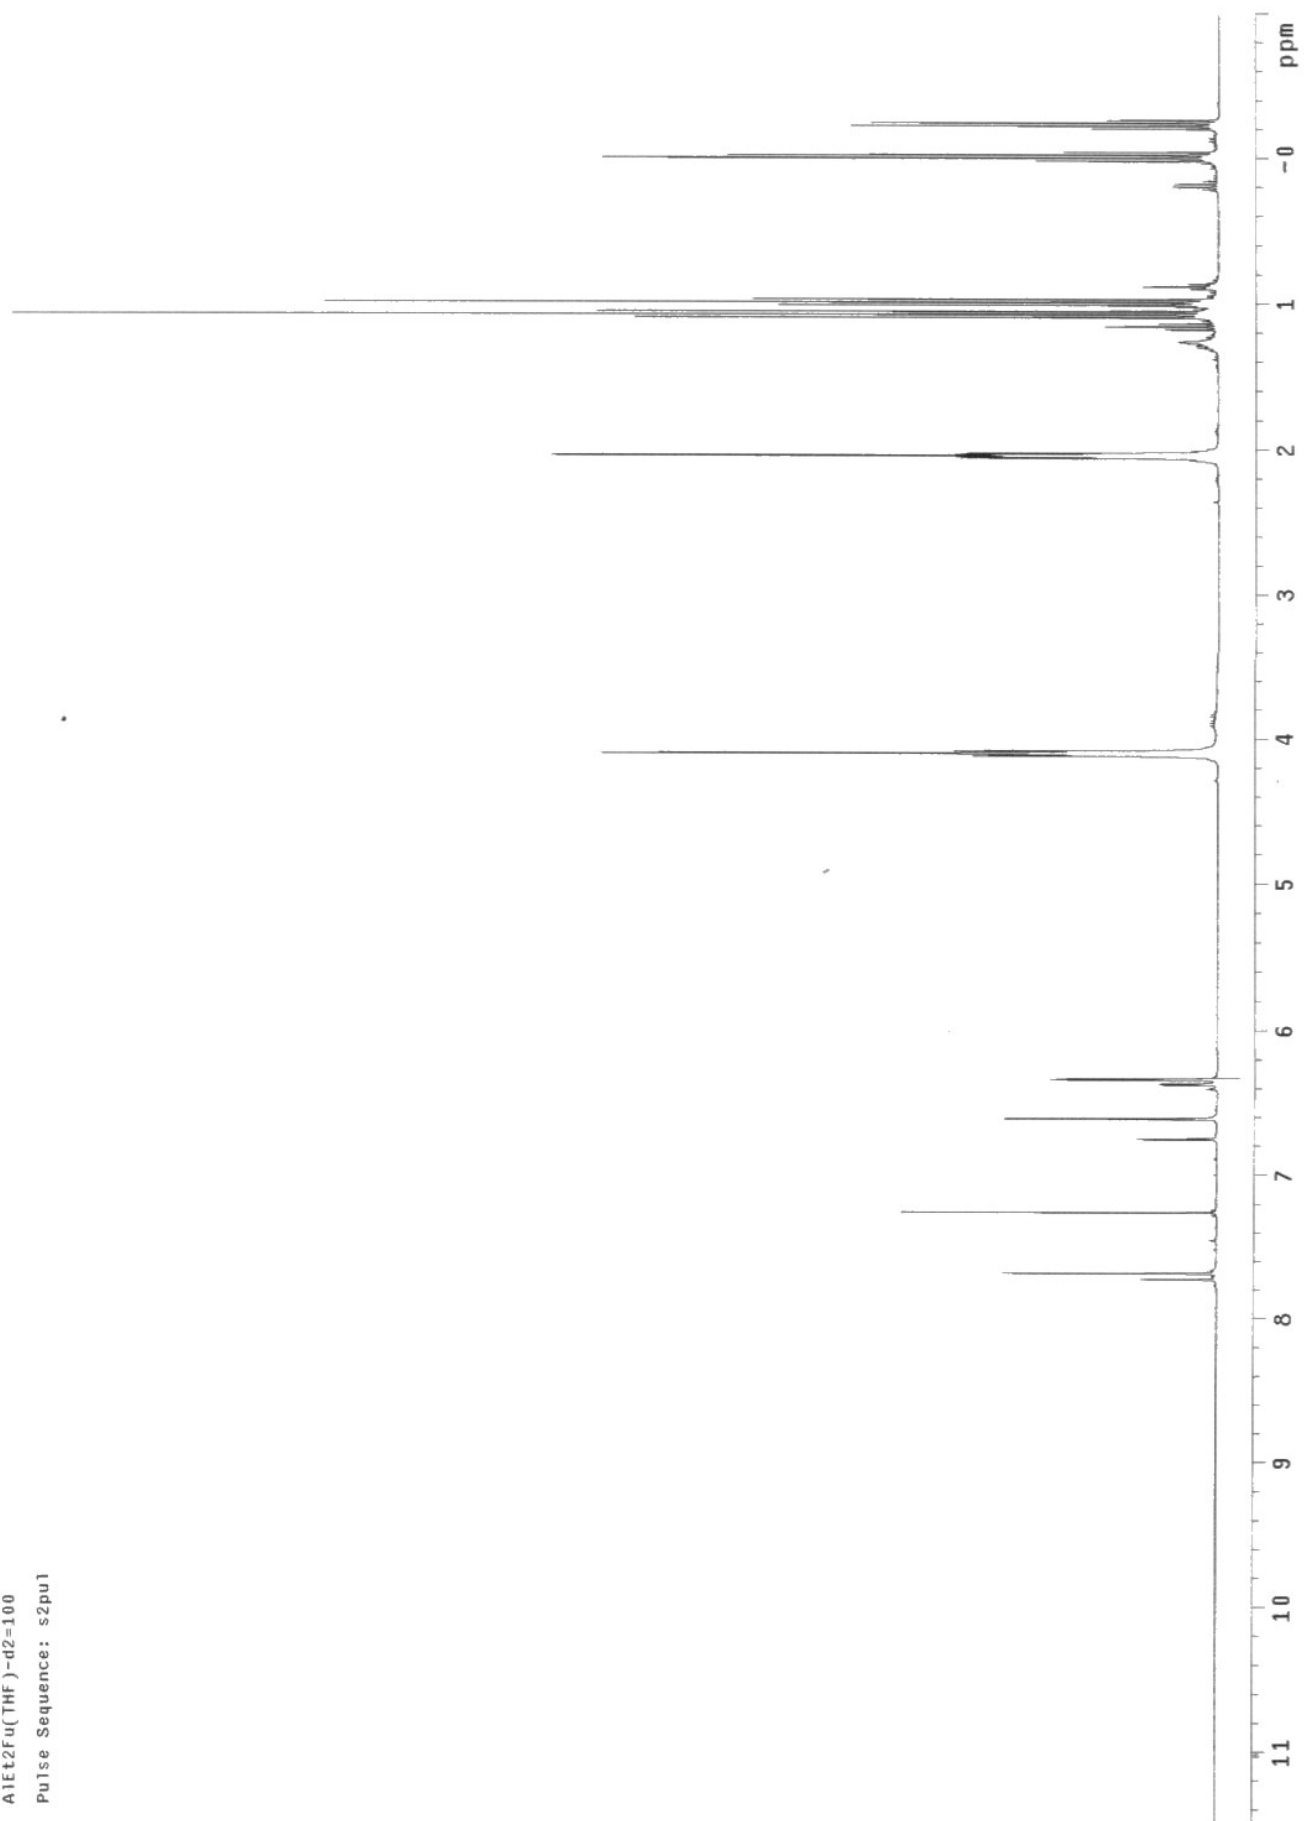

A1Et2Fu(THF)-d2=100  
Pulse Sequence: s2pu1

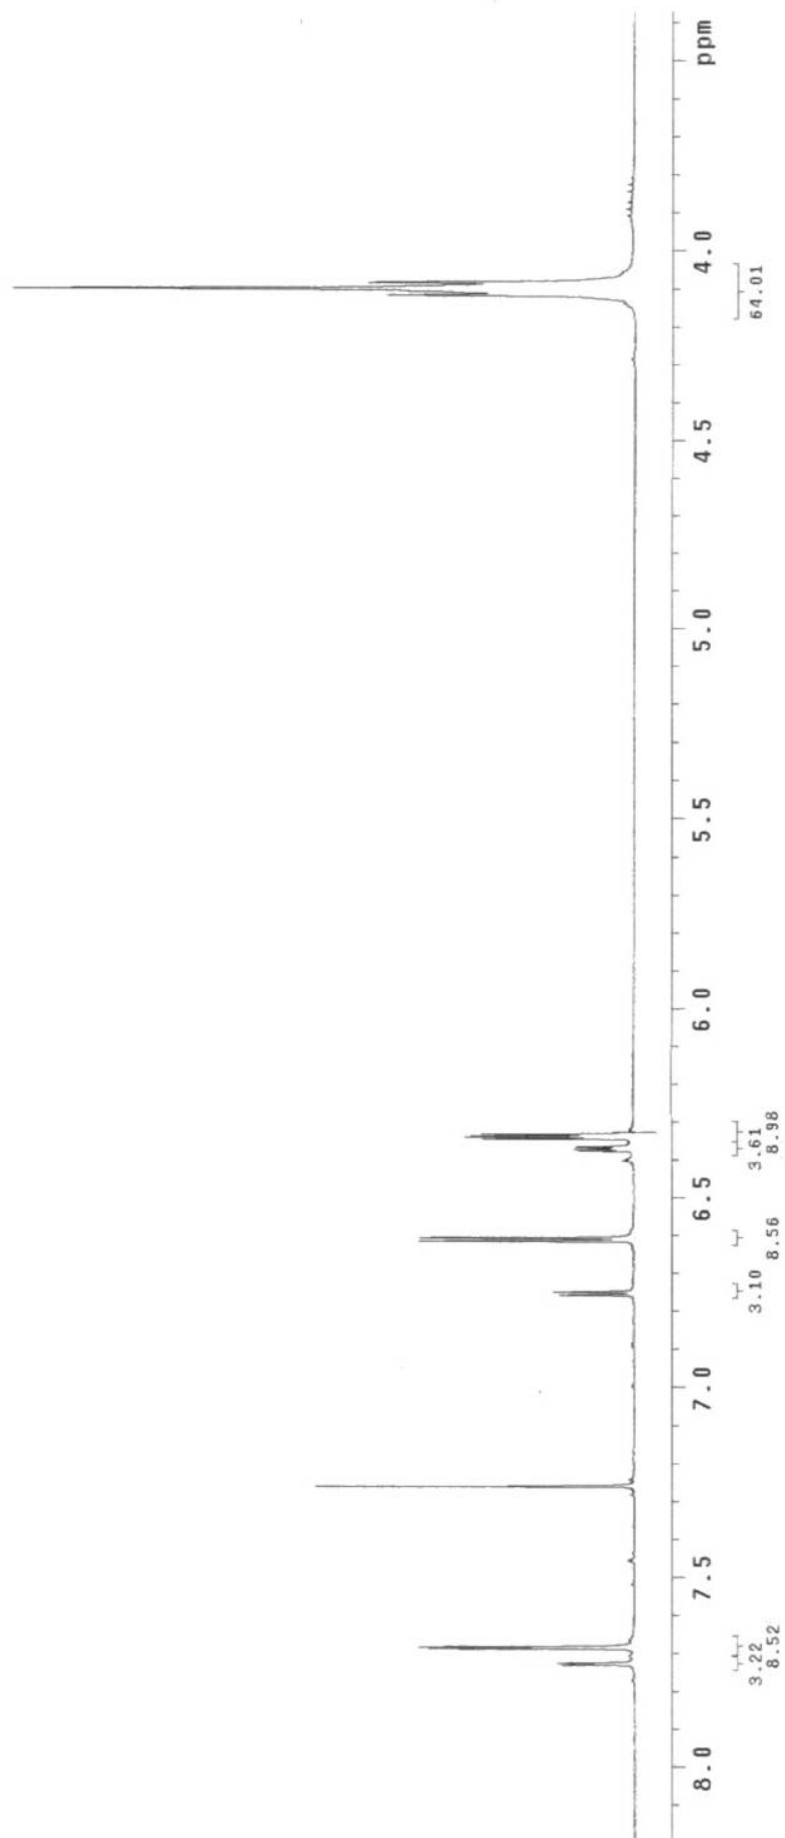

A1E12Fu(THF)-d2=100  
Pulse Sequence: s2pu1

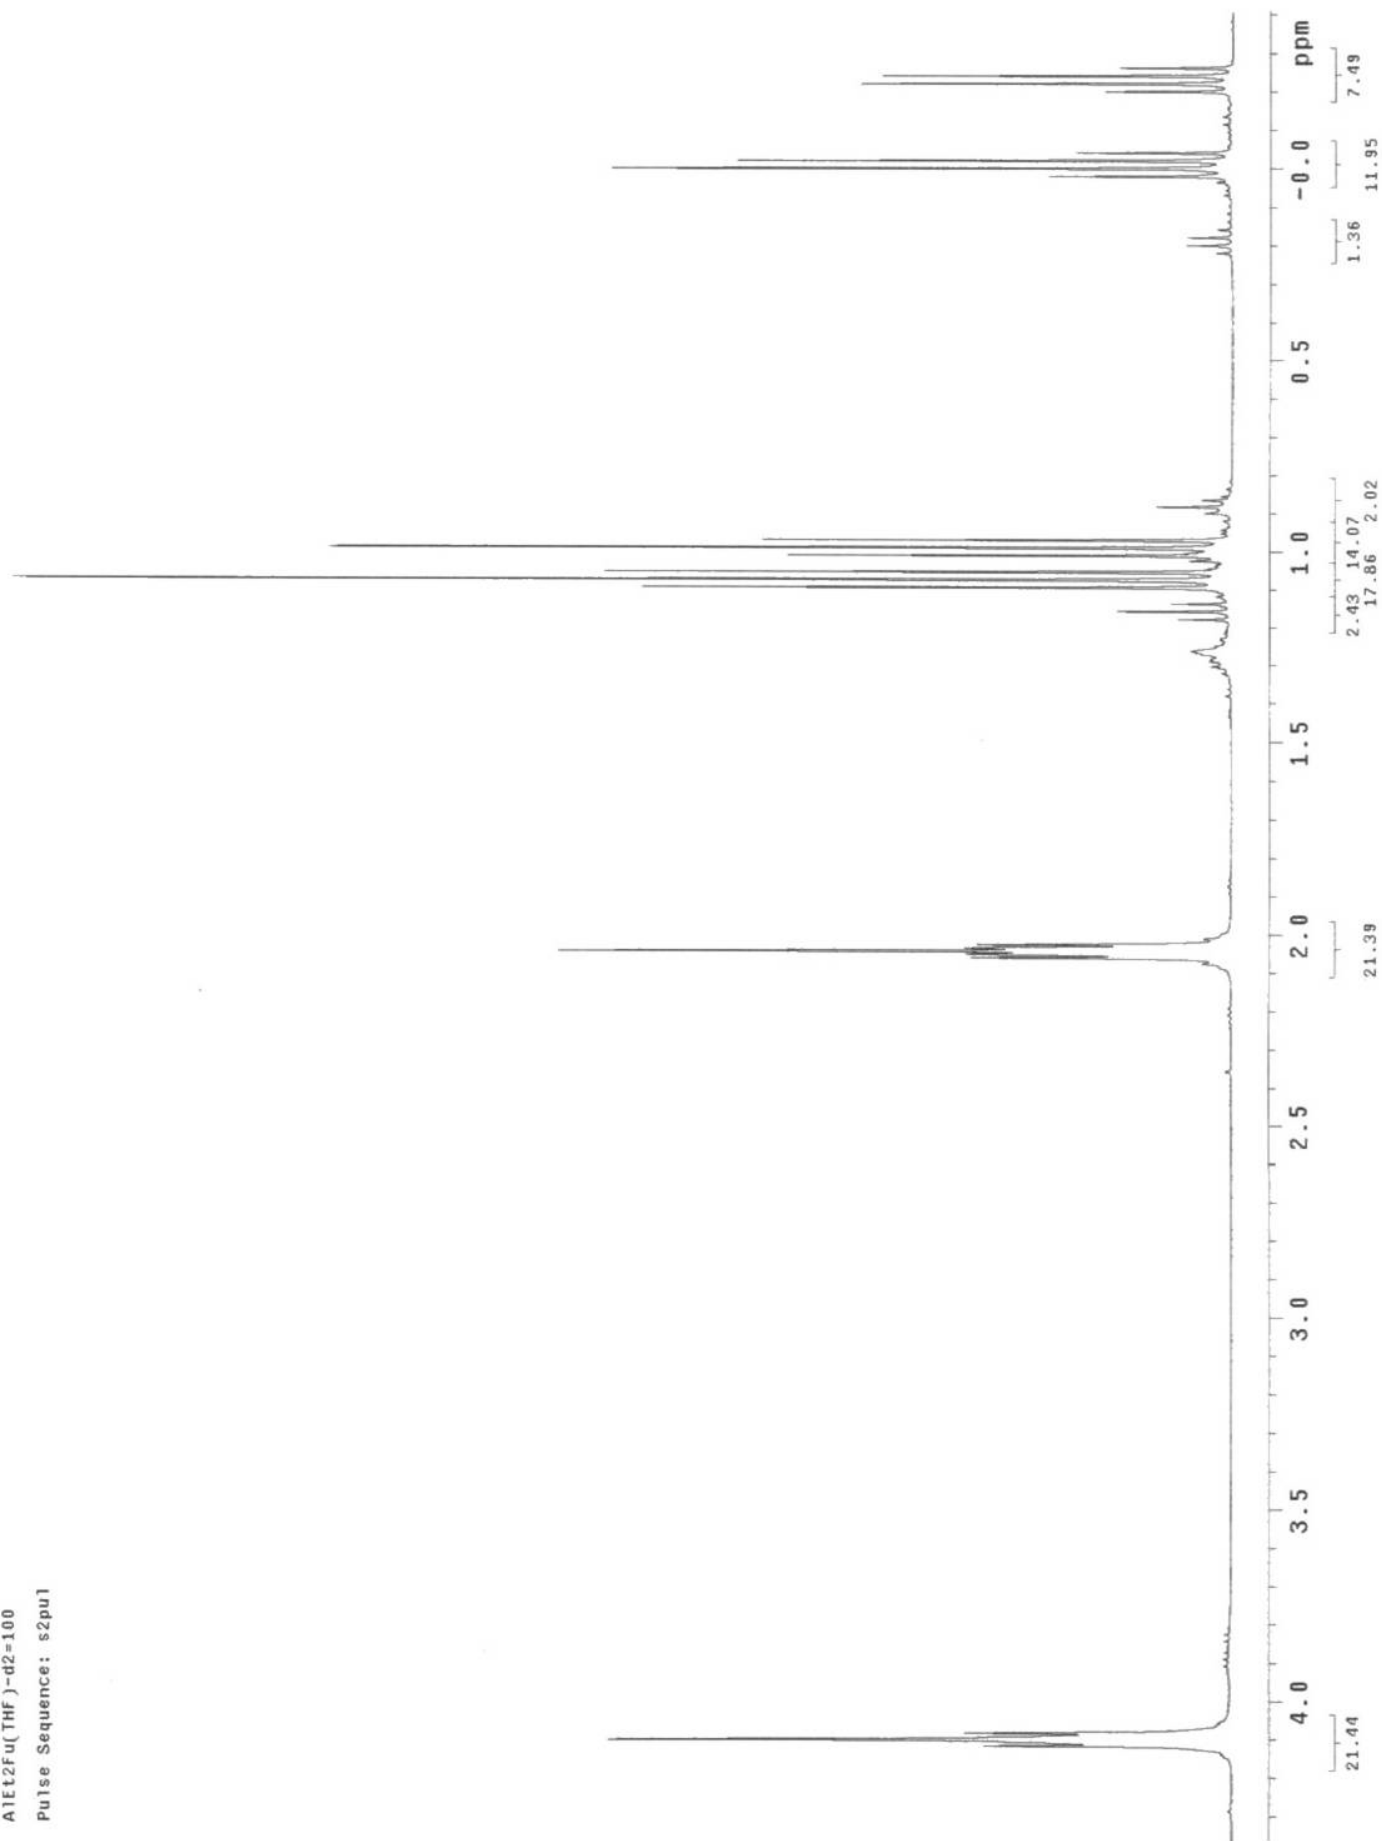

Supplement: b802441c.pdf [file b802441c.pdf]
